# Supplementary material
Source: PubMed Central journal article supplement (PMC2111118)

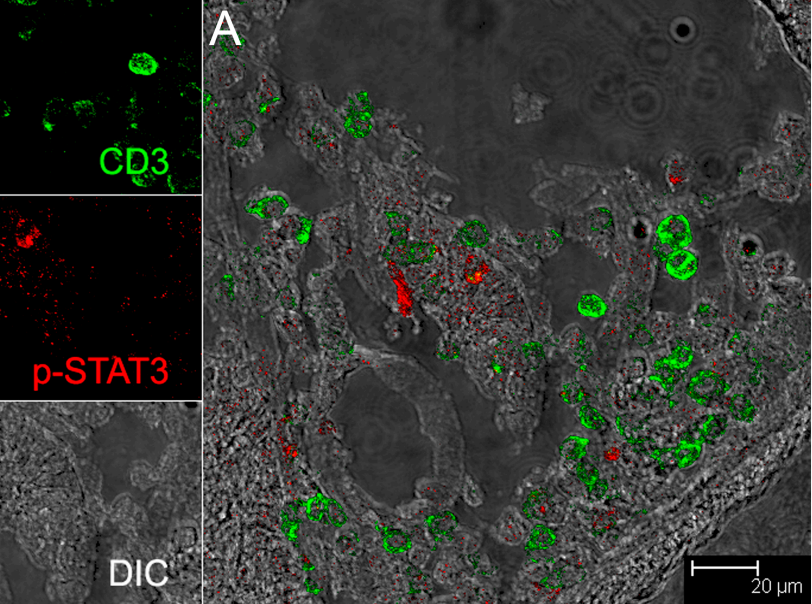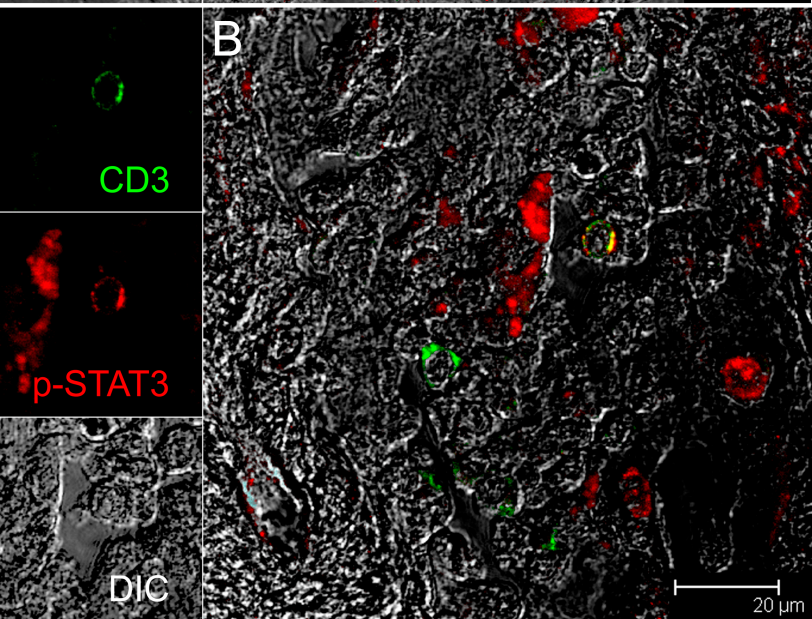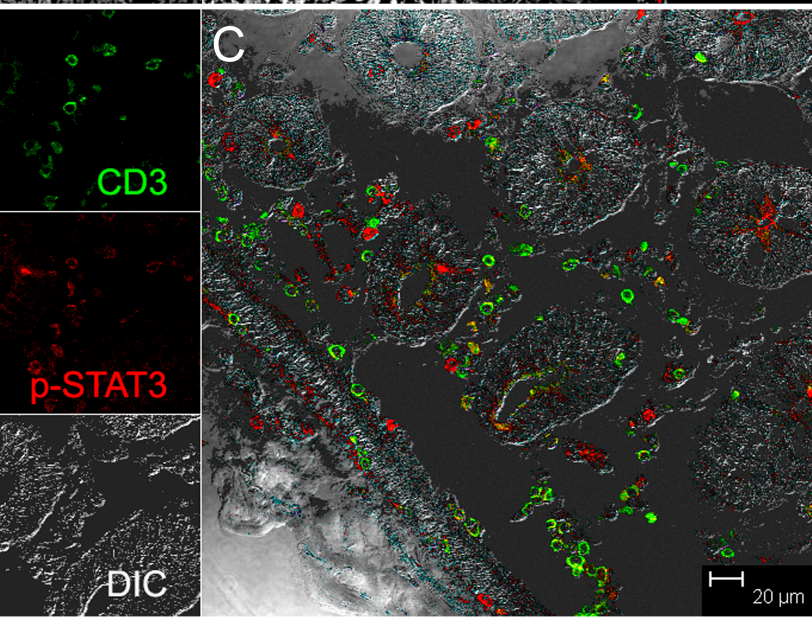

Supplement: amjpathol_ajpath.2007.070017_1.pdf [file amjpathol_ajpath.2007.070017_1.pdf]
